# Supplementary material for: Real-Life Effectiveness of Vismodegib in Patients with Metastatic and Advanced Basal Cell Carcinoma: Characterization of Adverse Events and Assessment of Health-Related Quality of Life using the Dermatology Life Quality Index (DLQI) Test
Source: Springer Nature journal article supplement (doi:10.1007/s13555-019-0303-4), 2019-06-04
Supplement: MOESM1 [file 16771560]

## DERMATOLOGY LIFE QUALITY INDEX (DLQI) - INSTRUCTIONS FOR USE

The Dermatology Life Quality Index questionnaire is designed for use in adults, i.e. patients over the age of 16. It is self explanatory and can be simply handed to the patient who is asked to fill it in without the need for detailed explanation. It is usually completed in one or two minutes.

### SCORING

The scoring of each question is as follows:

|                                          |          |
|------------------------------------------|----------|
| Very much                                | scored 3 |
| A lot                                    | scored 2 |
| A little                                 | scored 1 |
| Not at all                               | scored 0 |
| Not relevant                             | scored 0 |
| Question 7, 'prevented work or studying' | scored 3 |

The DLQI is calculated by summing the score of each question resulting in a maximum of 30 and a minimum of 0. The higher the score, the more quality of life is impaired.

### HOW TO INTERPRET MEANING OF DLQI SCORES

|         |                                          |
|---------|------------------------------------------|
| 0 – 1   | no effect at all on patient's life       |
| 2 – 5   | small effect on patient's life           |
| 6 – 10  | moderate effect on patient's life        |
| 11 – 20 | very large effect on patient's life      |
| 21 – 30 | extremely large effect on patient's life |

### REFERENCES

Finlay AY and Khan GK. Dermatology Life Quality Index (DLQI): a simple practical measure for routine clinical use. *Clin Exp Dermatol* 1994; **19**:210-216.

Basra MK, Fenech R, Gatt RM, Salek MS and Finlay AY. The Dermatology Life Quality Index 1994-2007: a comprehensive review of validation data and clinical results. *Br J Dermatol* 2008; **159**:997-1035.

Hongbo Y, Thomas CL, Harrison MA, Salek MS and Finlay AY. Translating the science of quality of life into practice: What do dermatology life quality index scores mean? *J Invest Dermatol* 2005; **125**:659-64.

*There is more information about the DLQI, including over 85 translations, at [www.dermatology.org.uk](http://www.dermatology.org.uk). The DLQI is copyright but may be used without seeking permission by clinicians for routine clinical purposes. For other purposes, please contact the copyright owners.*

## DERMATOLOGY LIFE QUALITY INDEX (DLQI) - INSTRUCTIONS FOR USE

The Dermatology Life Quality Index questionnaire is designed for use in adults, i.e. patients over the age of 16. It is self explanatory and can be simply handed to the patient who is asked to fill it in without the need for detailed explanation. It is usually completed in one or two minutes.

### SCORING

The scoring of each question is as follows:

|                                          |          |
|------------------------------------------|----------|
| Very much                                | scored 3 |
| A lot                                    | scored 2 |
| A little                                 | scored 1 |
| Not at all                               | scored 0 |
| Not relevant                             | scored 0 |
| Question 7, 'prevented work or studying' | scored 3 |

The DLQI is calculated by summing the score of each question resulting in a maximum of 30 and a minimum of 0. The higher the score, the more quality of life is impaired.

### HOW TO INTERPRET MEANING OF DLQI SCORES

|         |                                          |
|---------|------------------------------------------|
| 0 – 1   | no effect at all on patient's life       |
| 2 – 5   | small effect on patient's life           |
| 6 – 10  | moderate effect on patient's life        |
| 11 – 20 | very large effect on patient's life      |
| 21 – 30 | extremely large effect on patient's life |

### REFERENCES

Finlay AY and Khan GK. Dermatology Life Quality Index (DLQI): a simple practical measure for routine clinical use. *Clin Exp Dermatol* 1994; **19**:210-216.

Basra MK, Fenech R, Gatt RM, Salek MS and Finlay AY. The Dermatology Life Quality Index 1994-2007: a comprehensive review of validation data and clinical results. *Br J Dermatol* 2008; **159**:997-1035.

Hongbo Y, Thomas CL, Harrison MA, Salek MS and Finlay AY. Translating the science of quality of life into practice: What do dermatology life quality index scores mean? *J Invest Dermatol* 2005; **125**:659-64.

*There is more information about the DLQI, including over 85 translations, at [www.dermatology.org.uk](http://www.dermatology.org.uk). The DLQI is copyright but may be used without seeking permission by clinicians for routine clinical purposes. For other purposes, please contact the copyright owners.*
